# Supplementary material
Source: PubMed Central journal article supplement (PMC3071264)
Supplement: supp_110.087361_biolreprod.110.087361-1.pdf [file supp_110.087361_biolreprod.110.087361-1.pdf]

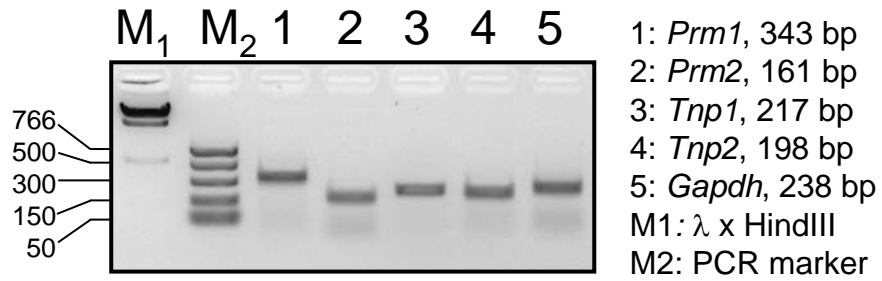

### Supplemental Figure S1

Electrophoresis of PCR products obtained during real-time RT-PCR analysis of whole testis total RNA shows the presence of single bands, verifying the validity of the utilized PCR primers and PCR conditions.
